# Supplementary material for: Dynamic bistable switches enhance robustness and accuracy of cell cycle transitions
Source: PubMed Central journal article supplement (PMC7817062; doi:10.1371/journal.pcbi.1008231), 2021-01-07

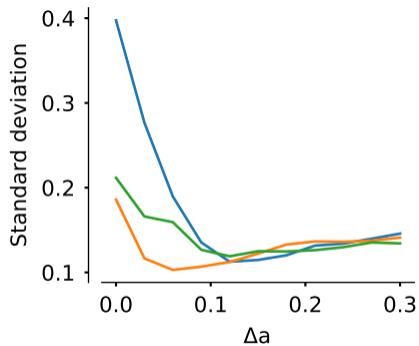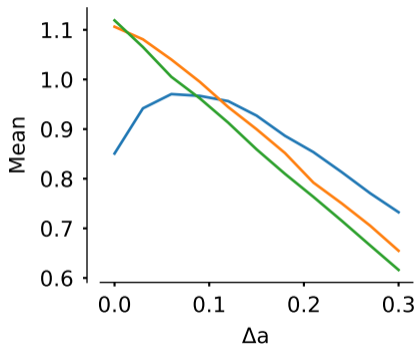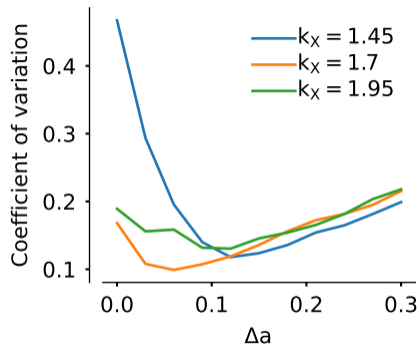

Supplement: pcbi.1008231.s002.pdf [file pcbi.1008231.s002.pdf]
