# Supplementary material for: Dynamic bistable switches enhance robustness and accuracy of cell cycle transitions
Source: PubMed Central journal article supplement (PMC7817062; doi:10.1371/journal.pcbi.1008231), 2021-01-07

$k_x = 1.45$ 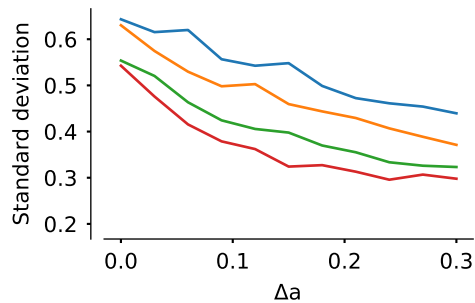 $k_x = 1.7$ 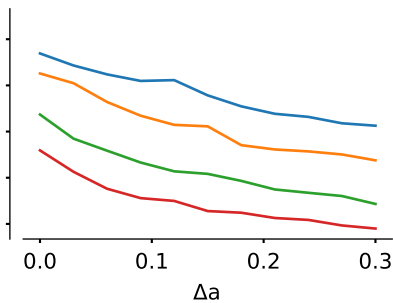 $k_x = 1.95$ 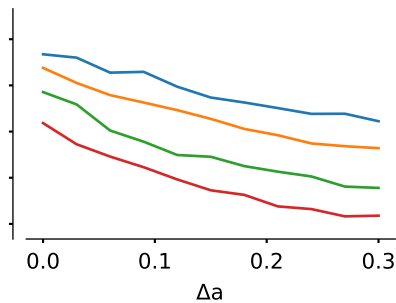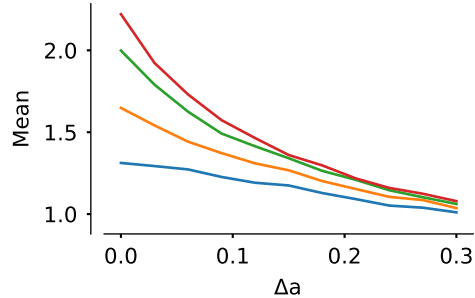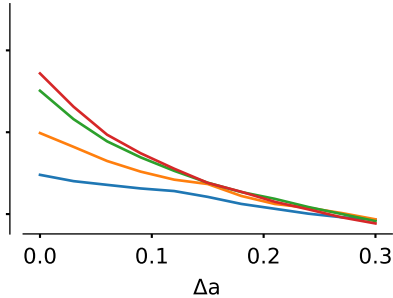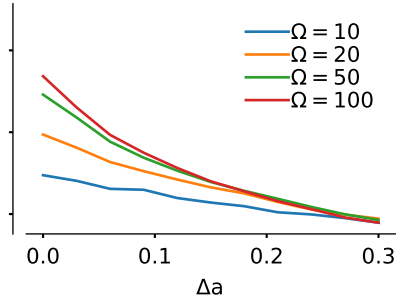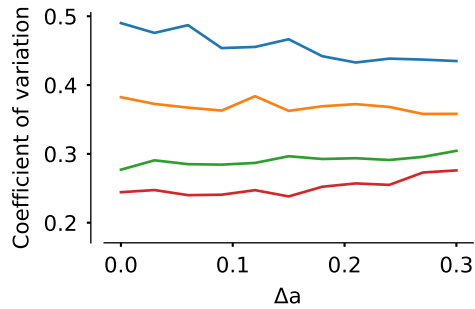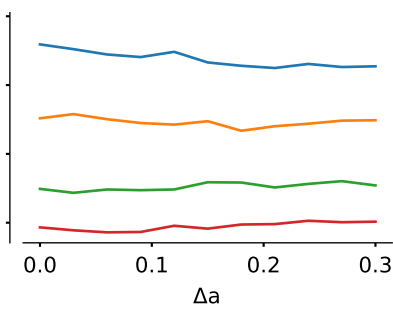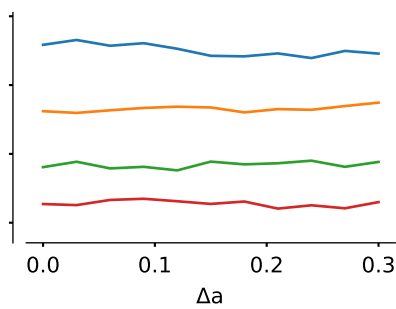

Supplement: pcbi.1008231.s003.pdf [file pcbi.1008231.s003.pdf]
