# Supplementary material for: Dynamic bistable switches enhance robustness and accuracy of cell cycle transitions
Source: PubMed Central journal article supplement (PMC7817062; doi:10.1371/journal.pcbi.1008231), 2021-01-07

$\tau = 0.0, \kappa = 1.0$ 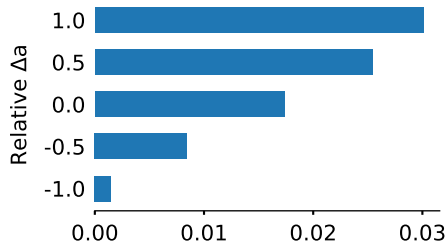 $\tau = 0.0, \kappa = 5.0$ 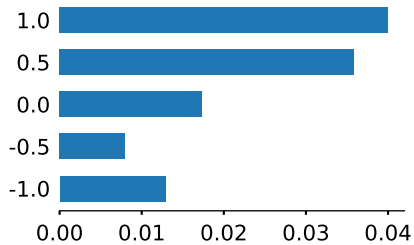 $\tau = 0.0, \kappa = 10.0$ 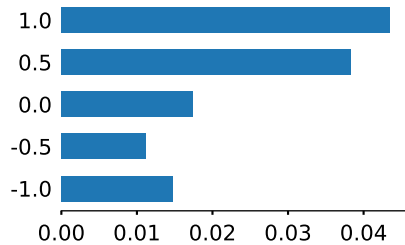 $\tau = 0.1, \kappa = 1.0$ 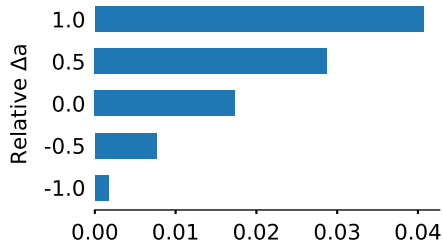 $\tau = 0.1, \kappa = 5.0$ 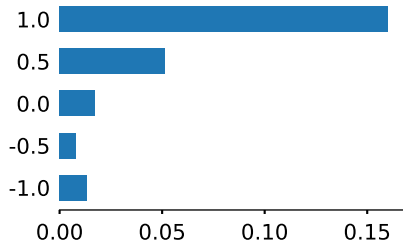 $\tau = 0.1, \kappa = 10.0$ 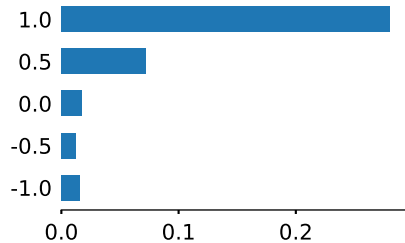 $\tau = 0.2, \kappa = 1.0$ 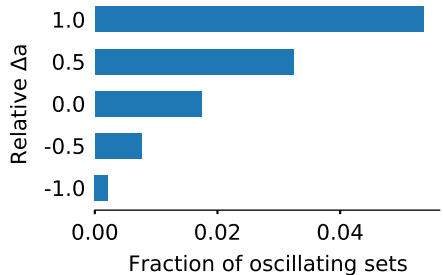 $\tau = 0.2, \kappa = 5.0$ 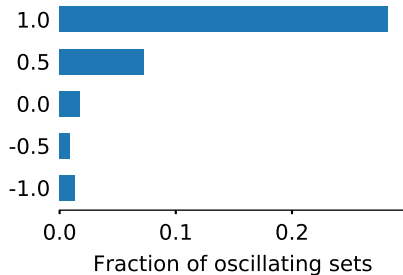 $\tau = 0.2, \kappa = 10.0$ 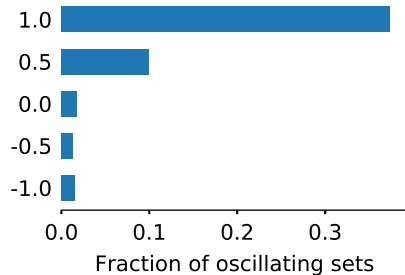

Supplement: pcbi.1008231.s004.pdf [file pcbi.1008231.s004.pdf]
