# Supplementary material for: Dynamic bistable switches enhance robustness and accuracy of cell cycle transitions
Source: PubMed Central journal article supplement (PMC7817062; doi:10.1371/journal.pcbi.1008231), 2021-01-07
Supplement: pcbi.1008231.s005.pdf [file pcbi.1008231.s005.pdf]

| Symbol               | Meaning                                             | Value      |
|----------------------|-----------------------------------------------------|------------|
| $k_s$                | Cyclin production rate                              | 1.5 nM/min |
| $a_{\text{Cdc25}}$   | Basal Cdc25 activity                                | 0.16       |
| $b_{\text{Cdc25}}$   | Maximal Cdc25 activity                              | 0.8        |
| $K_{\text{Cdc25}}$   | Threshold for Cdc25 activation                      | 35 nM      |
| $m_{\text{Cdc25}}$   | Hill exponent for Cdc25 activation                  | 11         |
| $a_{\text{Wee1}}$    | Basal Wee1 activity                                 | 0.08       |
| $b_{\text{Wee1}}$    | Maximal Wee1 activity                               | 0.4        |
| $K_{\text{Wee1}}$    | Threshold for Wee1 activation                       | 30 nM      |
| $m_{\text{Wee1}}$    | Hill exponent for Wee1 activation                   | 3.5        |
| $k_{n,\text{Cyc}}$   | Cyclin B-Cdk1 import rate into nucleus (unmodified) | 0.05 1/min |
| $k_{c,\text{Cyc}}$   | Cyclin B-Cdk1 export rate from nucleus              | 0.05 1/min |
| $k_{n,\text{Cdc25}}$ | Cdc25 import rate into nucleus (unmodified)         | 0.05 1/min |
| $k_{c,\text{Cdc25}}$ | Cdc25 export rate from nucleus                      | 0.05 1/min |
