# Supplementary material for: Dynamic bistable switches enhance robustness and accuracy of cell cycle transitions
Source: PubMed Central journal article supplement (PMC7817062; doi:10.1371/journal.pcbi.1008231), 2021-01-07
Supplement: pcbi.1008231.s006.pdf [file pcbi.1008231.s006.pdf]

| Parameter  | Low  | High | Logarithmic? |
|------------|------|------|--------------|
| $a$        | 0.01 | 2    | No           |
| $a'$       | 0.01 | 2    | No           |
| $b$        | 0.01 | 10   | No           |
| $b'$       | 0.01 | 10   | No           |
| $K$        | 0.01 | 5    | No           |
| $K'$       | 0.01 | 5    | No           |
| $n$        | 1    | 15   | No           |
| $m$        | 1    | 15   | No           |
| $k_X$      | 0.1  | 5    | No           |
| $\epsilon$ | 0.01 | 1    | Yes          |
